# Supplementary material for: Insights into the Role of the Microbiota and of Short-Chain Fatty Acids in Rubinstein–Taybi Syndrome
Source: Int J Mol Sci. 2021 Mar 31;22(7):3621. doi: 10.3390/ijms22073621 (PMC8037970; doi:10.3390/ijms22073621)
Supplement: Supplementary file 1 [file ijms-22-03621-s001.pdf]

## Supplementary materials

### Insights into the role of the microbiota and of short chain fatty acids in Rubinstein-Taybi syndrome

Elisabetta Di Fede<sup>1,†</sup>, Emerenziana Ottaviano<sup>1,†</sup>, Paolo Grazioli<sup>1</sup>, Camilla Ceccarani<sup>1,2</sup>, Antonio Galeone<sup>3</sup>, Chiara Parodi<sup>1</sup>, Elisa A. Colombo<sup>1</sup>, Giulia Bassanini<sup>1</sup>, Grazia Fazio<sup>4</sup>, Marco Severgnini<sup>2</sup>, Donatella Milani<sup>5</sup>, Elvira Verduci<sup>1,6</sup>, Thomas Vaccari<sup>3</sup>, Valentina Massa<sup>1,7,‡</sup>, Elisa Borghi<sup>1,‡</sup> and Cristina Gervasini<sup>1,7,‡,\*</sup>

\*Corresponding author: cristina.gervasini@unimi.it; Tel.: +39-0250-3230-28

#### **CREBBP LCLs acetylation levels**

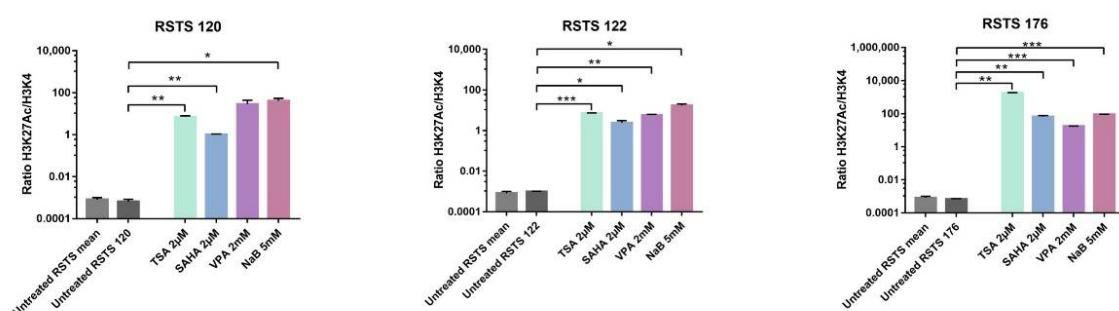

#### **EP300 LCLs acetylation levels**

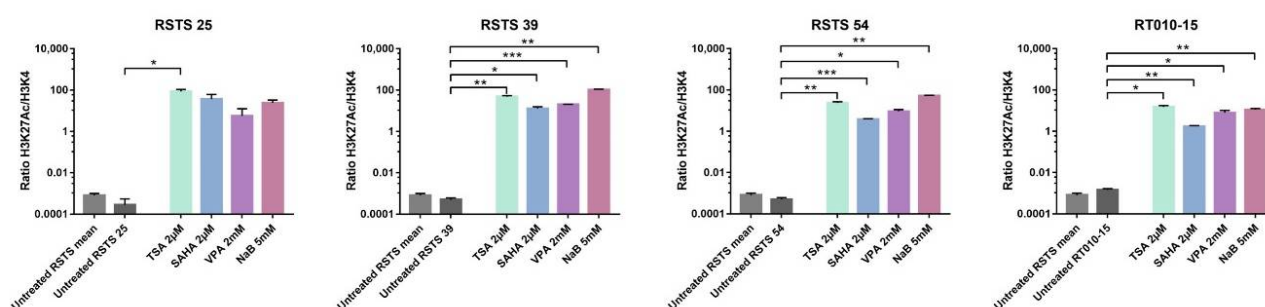

**Figure S1.** Insight on single-RSTS LCLs histone acetylation.

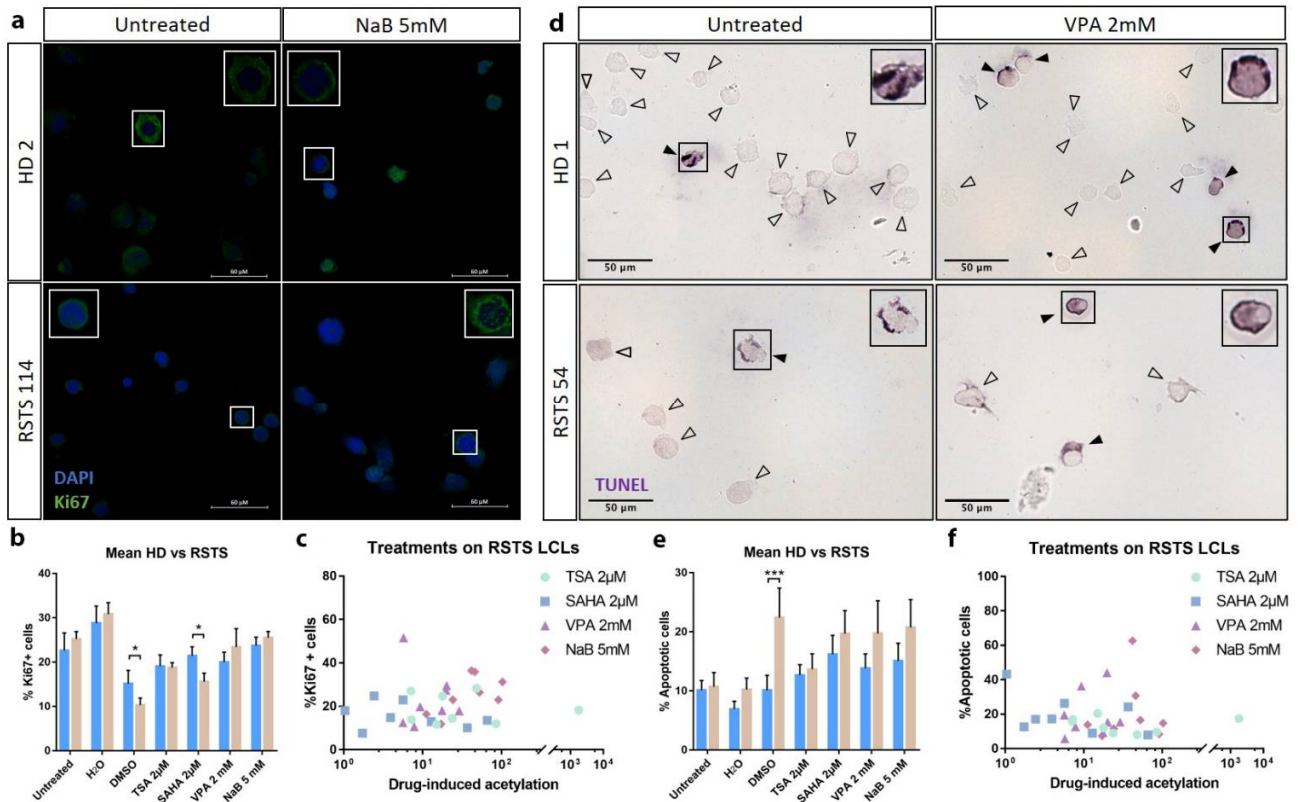

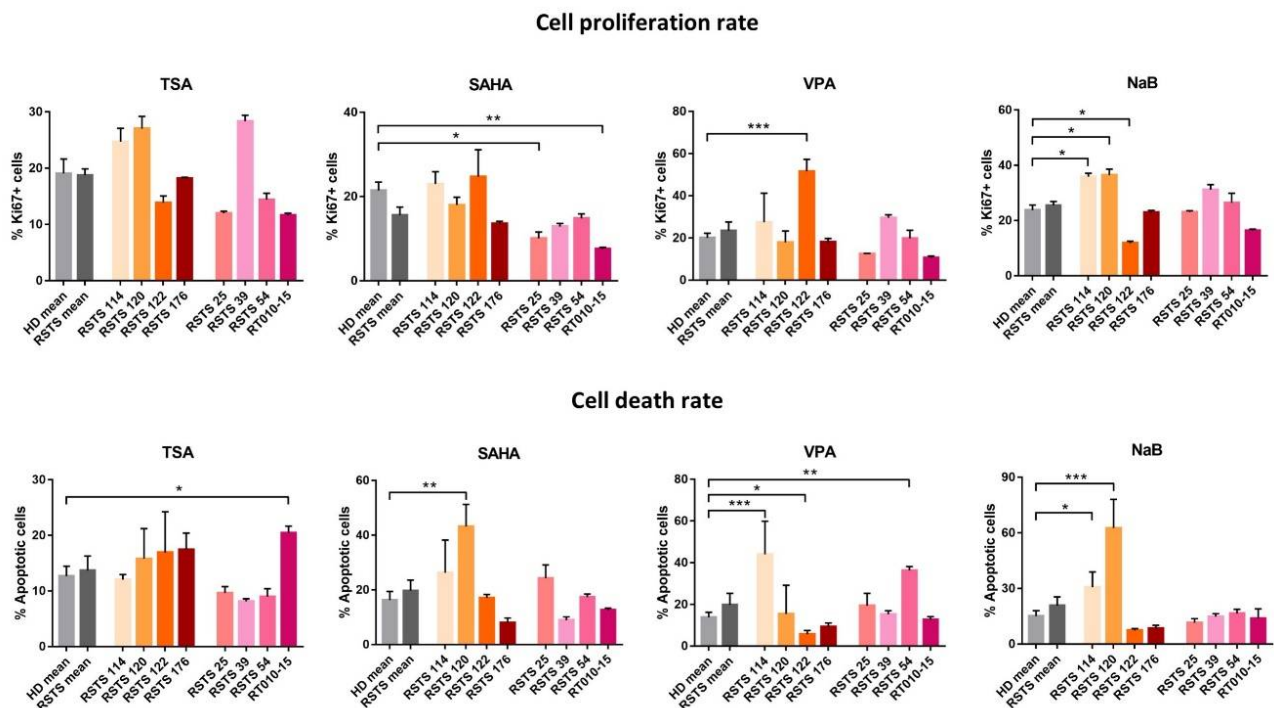

**Figure S3.** Insights on cell proliferation and cell death rate of RSTS LCLs upon HDAC inhibitors exposure.

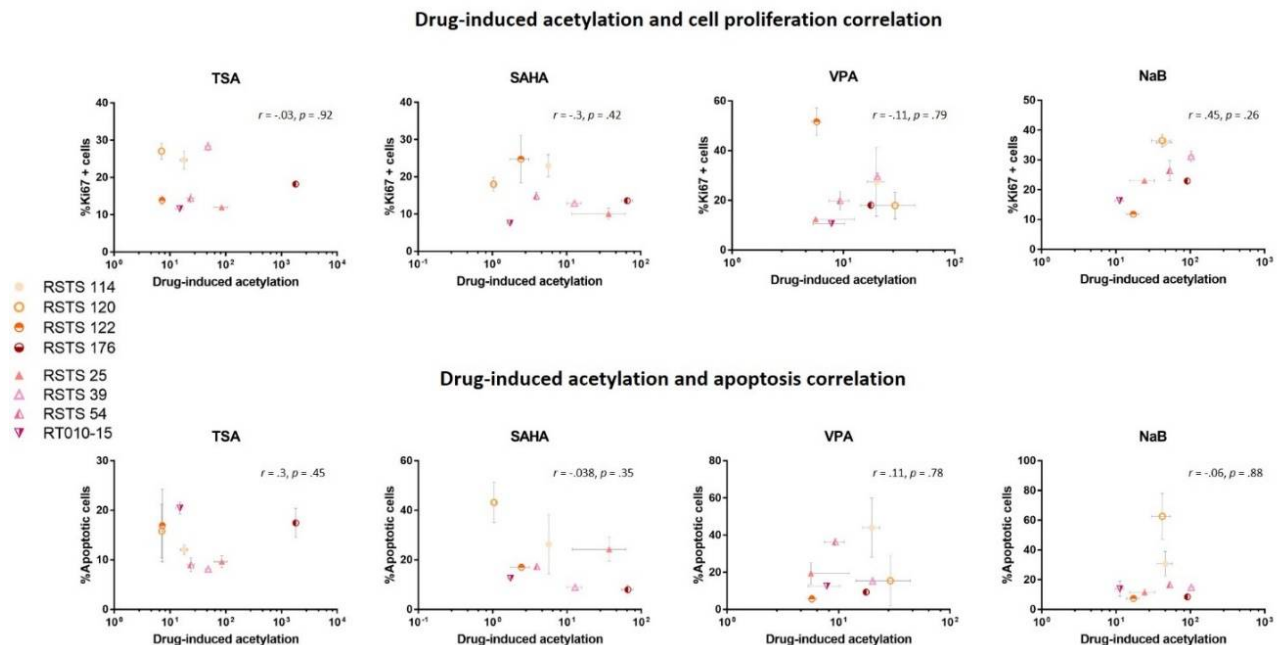

**Figure S4.** Correlation between HDACi-induced acetylation versus cell proliferation and apoptosis in RSTS LCLs. Correlation between cell proliferation rate (% Ki67+ cells, on Y-axis) and drug-induced acetylation (X-axis) in RSTS LCLs exposed to different HDACi (TSA 2 $\mu$ M, SAHA 2 $\mu$ M, VPA 2mM and NaB 5mM) was not significant (Pearson correlation  $p > 0.05$ ): treatments with TSA 2 $\mu$ M and VPA 2mM showed a very weak negative correlation ( $r = -0.03$  and  $r = -0.11$  respectively), SAHA 2 $\mu$ M a weak negative correlation ( $r = -0.3$ ), while NaB 5mM a moderate positive correlation ( $r = 0.45$ ). Correlation between cell death rate (% Apoptotic cells, on Y-axis) and drug-induced acetylation (X-axis) in RSTS LCLs exposed to different HDACi (TSA 2 $\mu$ M, SAHA 2 $\mu$ M, VPA 2mM and NaB 5mM) showed no significant Pearson correlation  $p$  value: TSA 2 $\mu$ M and VPA 2mM showed, respectively, a weak and a very weak positive correlation ( $r = 0.3$  and  $r = 0.11$ ), while SAHA 2 $\mu$ M and NaB 5mM shared a very weak negative correlation ( $r = -0.038$  and  $r = -0.06$  respectively).

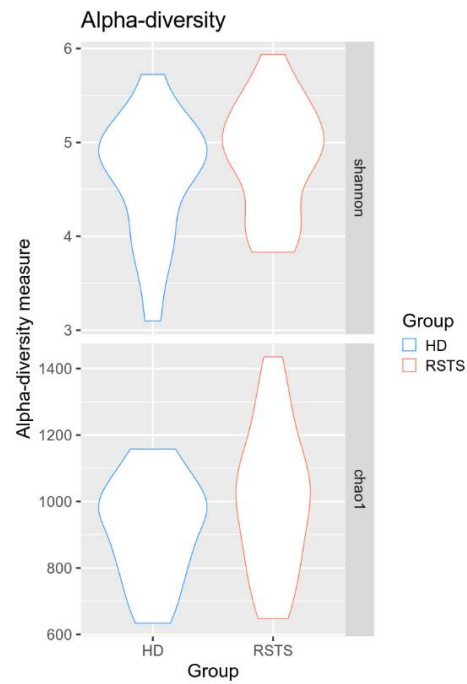

**Figure S5.** Gut microbiota composition in HD and RSTS subjects.

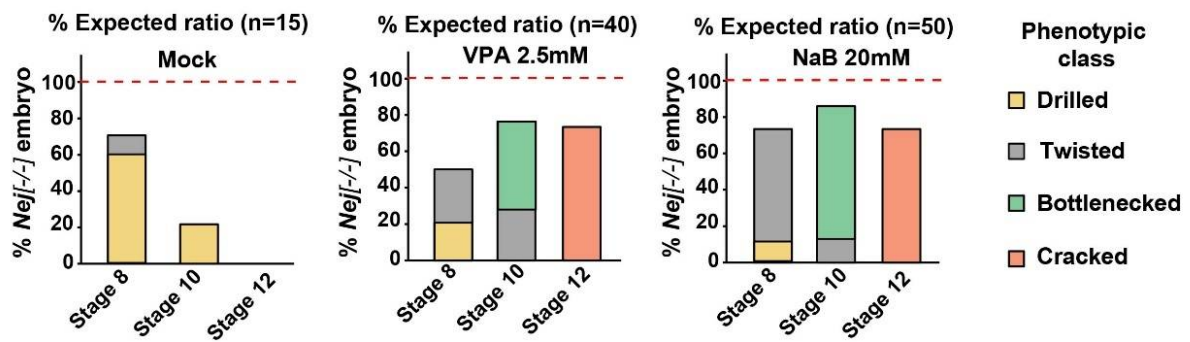

**Figure S6.** Normal and altered phenotypes of *nej* mutant embryos from stage 8 to 12 treated or not with HDACi.

**Table S1.** RSTS LCLs used for *in vitro* treatments.

| Gene          | RSTS LCLs | cDNA change    | Protein change                           | Mutation type  | Reference                  |
|---------------|-----------|----------------|------------------------------------------|----------------|----------------------------|
| <b>CREBBP</b> | RSTS 114  | c.4485-7G>C    | p.(R1428_G1465del)<br>p.(F1379_G1465del) | Splicing       | Lopez-Atalaya et al., 2012 |
|               | RSTS 120  | c.5837dupC     | p.(P1947Tfs*19)                          | Frameshift     | Spena et al., 2015         |
|               | RSTS 122  | c.4394+5G>T    | p.(R1428_G1465del)<br>p.(F1379_G1465del) | Splicing       | Spena et al., 2015         |
|               | RSTS 176  | c.4508A>T      | p.(Y1503F)                               | Missense (HAT) | Spena et al., 2015         |
| <b>EP300</b>  | RSTS 25   | c.41_51delinsT | p.(K14Ifs*31)                            | Frameshift     | Negri et al., 2015         |
|               | RSTS 39   | c.4640dupA     | p.(N1547Kfs*3)                           | Frameshift     | Negri et al., 2016         |
|               | RSTS 54   | c.669dupT      | p.(Q223Sfs*19)                           | Frameshift     | Negri et al., 2015         |
|               | RT010-15  | c.4763T>C      | p.(M1588T)                               | Missense (HAT) | this study                 |

**Table S2.** Conditions of *in vitro* treatments used on LCLs.

| Treatment        | TSA                                                                | SAHA                                                                   | VPA                                                                                               | NaB                                                                 |
|------------------|--------------------------------------------------------------------|------------------------------------------------------------------------|---------------------------------------------------------------------------------------------------|---------------------------------------------------------------------|
| <b>Against</b>   | Class I, IIa, IIb HDAC                                             | Class I, IIa, IIb HDAC                                                 | Class I (HDAC1, HDAC2, HDAC3)                                                                     | Class I HDAC                                                        |
| <b>Vehicle</b>   | DMSO                                                               | DMSO                                                                   | H <sub>2</sub> O                                                                                  | H <sub>2</sub> O                                                    |
| <b>Time</b>      | 2h                                                                 | 24h                                                                    | 24h                                                                                               | 24h                                                                 |
| <b>Dosage</b>    | 1 - 2 - 5 µM                                                       | 1 - 2 - 10 µM                                                          | 0,5 - 1 - 2 mM                                                                                    | 1 - 2 - 5 mM                                                        |
| <b>Reference</b> | Schölz et al., 2015;<br>Chang et al., 2018;<br>Freese et al., 2019 | Schölz et al., 2015;<br>Freese et al., 2019;<br>Tarasenko et al., 2018 | Schölz et al., 2015;<br>Chang et al., 2018;<br>Tarasenko et al., 2018;<br>Gottlicher et al., 2001 | Schölz et al., 2015;<br>Chang et al., 2018;<br>Chriett et al., 2019 |

**Table S3.** Nutritional values of the enrolled patients. Daily dietary intake of energy and macronutrients of in RTST patients and healthy controls; values are expressed as mean (standard deviation). p-values <0.05 are considered significant (Mann-Whitney test).

| Variable             | HD<br>Mean (SD) | RSTS<br>Mean (SD) | p-value  | Reference values             |
|----------------------|-----------------|-------------------|----------|------------------------------|
| <b>Energy intake</b> |                 |                   |          | boys:1330-4020               |
| kcal                 | 1528 (343)      | 1185 (294)        | 0.0054** | girls:1220-3550<br>kcal (AR) |
| <b>Proteins</b>      |                 |                   |          |                              |
| g                    | 60.8 (17.97)    | 46.22 (13.21)     | 0.0079** | 16-50 g (AR)                 |
| % energy             | 15.93 (3.35)    | 15.72 (3.29)      | 0.8990   | 12-15% (RI)                  |
| <b>Lipids</b>        |                 |                   |          |                              |
| g                    | 51.55 (15.05)   | 43.73 (13)        | 0.0609   |                              |
| % energy             | 30.36 (6.96)    | 33.16 (5.38)      | 0.1206   | 20-35% (RI)                  |
| <b>Carbohydrates</b> |                 |                   |          |                              |
| g                    | 209.4 (60.81)   | 158.8 (41.48)     | 0.0054** |                              |
| % energy             | 54.29 (7.62)    | 53.65 (5.48)      | 0.5626   | 45-60% (RI)                  |
| <b>Total fiber</b>   |                 |                   |          |                              |
| g                    | 20.41 (420.05)  | 17.33 (13.4)      | 0.4369   |                              |
| g/1000 Kcal          | 12.87 (10.35)   | 14.54 (9.19)      | 0.2065   | 8.40 g/1000 kcal (AI)        |

AR. average requirement; RI. reference intake; AI. adequate intake.

**Table S4.** Gut microbiota composition in HD and RSTS subjects. Major bacterial groups were organized in three phylogenetic levels (phylum, family, genus) and reported as average relative abundance  $\pm$  standard deviation. p-values  $<0.05$  were considered significant.

| TAXONOMIC LEVEL |                            |                          | HD              | RSTS            | p-value |     |
|-----------------|----------------------------|--------------------------|-----------------|-----------------|---------|-----|
| Phylum          | Family                     | Genus                    |                 |                 |         |     |
| FIRMICUTES      |                            |                          | 73.4 $\pm$ 15.6 | 58.5 $\pm$ 18.8 | 0.019   | *   |
|                 | Ruminococcaceae            |                          | 41.9 $\pm$ 15.1 | 32.2 $\pm$ 13.9 | 0.049   | *   |
|                 |                            | <i>Faecalibacterium</i>  | 9.8 $\pm$ 2.2   | 3.3 $\pm$ 3.8   | 0.001   | *** |
|                 |                            | <i>Ruminococcus</i>      | 6.4 $\pm$ 5.1   | 6.4 $\pm$ 4.9   | 0.877   |     |
|                 |                            | <i>Oscillospira</i>      | 2.4 $\pm$ 2.4   | 5.1 $\pm$ 5.0   | 0.007   | **  |
|                 |                            | Ruminococcaceae (other)  | 13.3 $\pm$ 15.9 | 8.2 $\pm$ 10.2  | 0.746   |     |
|                 |                            | Unclass. Ruminococcaceae | 9.6 $\pm$ 9.0   | 9.0 $\pm$ 10.1  | 0.525   |     |
|                 | Lachnospiraceae            |                          | 16.2 $\pm$ 7.2  | 13.1 $\pm$ 7.3  | 0.187   |     |
|                 |                            | <i>Roseburia</i>         | 5.2 $\pm$ 5.8   | 3.4 $\pm$ 4.9   | 0.053   |     |
|                 |                            | <i>Blautia</i>           | 2.5 $\pm$ 3.3   | 1.8 $\pm$ 1.3   | 0.855   |     |
|                 |                            | <i>Coproccoccus</i>      | 2.2 $\pm$ 1.4   | 2.0 $\pm$ 2.4   | 0.168   |     |
|                 |                            | <i>Clostridium</i>       | 1.1 $\pm$ 1.6   | 0.6 $\pm$ 1.1   | 0.263   |     |
|                 |                            | <i>Dorea</i>             | 0.8 $\pm$ 0.9   | 0.8 $\pm$ 1.0   | 0.855   |     |
|                 |                            | Unclass. Lachnospiraceae | 3.3 $\pm$ 3.4   | 2.7 $\pm$ 2.1   | 0.471   |     |
|                 | Veillonellaceae            |                          | 6.0 $\pm$ 6.1   | 5.1 $\pm$ 5.4   | 0.703   |     |
|                 |                            | <i>Dialister</i>         | 5.1 $\pm$ 5.9   | 3.1 $\pm$ 4.9   | 0.501   |     |
|                 | Clostridiaceae             |                          | 2.4 $\pm$ 3.8   | 0.9 $\pm$ 1.2   | 0.095   |     |
|                 |                            | <i>Clostridium</i>       | 1.1 $\pm$ 1.6   | 0.6 $\pm$ 1.1   | 0.263   |     |
|                 | Unclassified Clostridiales |                          | 4.8 $\pm$ 6.7   | 3.6 $\pm$ 5.9   | 0.746   |     |
|                 | Streptococcaceae           |                          | 1.0 $\pm$ 2.0   | 1.8 $\pm$ 2.7   | 0.315   |     |
|                 |                            | <i>Streptococcus</i>     | 1.0 $\pm$ 2.0   | 1.7 $\pm$ 2.7   | 0.641   |     |

|                        |                                   |             |             |       |   |
|------------------------|-----------------------------------|-------------|-------------|-------|---|
| <i>BACTEROIDETES</i>   |                                   | 16.8 ± 14   | 28.7 ± 21   | 0.065 |   |
|                        | <i>Bacteroidaceae</i>             | 10.3 ± 10.3 | 21.1 ± 16.3 | 0.021 | * |
|                        | <i>Bacteroides</i>                | 10.3 ± 10.3 | 21.1 ± 16.3 | 0.021 | * |
|                        | <i>Rikenellaceae</i>              | 2.6 ± 2.5   | 3.7 ± 3.3   | 0.220 |   |
|                        | <i>Unclass.<br/>Rikenellaceae</i> | 2.5 ± 2.4   | 3.6 ± 3.3   | 0.263 |   |
|                        | <i>Prevotellaceae</i>             | 2.0 ± 4.4   | 0.9 ± 3.0   | 0.110 |   |
|                        | <i>Prevotella</i>                 | 2.1 ± 4.4   | 0.8 ± 3.0   | 0.115 |   |
|                        | <i>Porphyromonadaceae</i>         | 0.8 ± 1.4   | 1.6 ± 2.2   | 0.177 |   |
|                        | <i>Parabacteroides</i>            | 1.4 ± 2.2   | 1.5 ± 2.3   | 0.217 |   |
| <i>VERRUCOMICROBIA</i> |                                   | 6.8 ± 14.7  | 9.4 ± 10.1  | 0.056 |   |
|                        | <i>Verrucomicrobiaceae</i>        | 6.8 ± 14.7  | 9.4 ± 10.1  | 0.056 |   |
|                        | <i>Akkermansia</i>                | 6.8 ± 14.7  | 9.4 ± 10.1  | 0.056 |   |
| <i>PROTEOBACTERIA</i>  |                                   | 1.2 ± 1.5   | 2.1 ± 2.1   | 0.061 |   |
|                        | <i>Enterobacteriaceae</i>         | 1.0 ± 1.5   | 1.5 ± 2.2   | 0.358 |   |
|                        | <i>Escherichia</i>                | 0.8 ± 1.2   | 1.3 ± 2.2   | 0.263 |   |
| <i>ACTINOBACTERIA</i>  |                                   | 1.6 ± 2.2   | 1.1 ± 1.9   | 0.621 |   |
|                        | <i>Bifidobacteriaceae</i>         | 1.4 ± 2.2   | 1.0 ± 1.9   | 0.724 |   |
|                        | <i>Bifidobacterium</i>            | 1.4 ± 2.2   | 1.1 ± 1.9   | 0.724 |   |
